# Supplementary material for: Assessing anxiety among adolescents in Hong Kong: psychometric properties and validity of the Generalised Anxiety Disorder-7 (GAD-7) in an epidemiological community sample
Source: PubMed Central journal article supplement (PMC9664827; doi:10.1186/s12888-022-04329-9), 2022-11-14
Supplement: 12888_2022_4329_MOESM1_ESM.pdf [file 12888_2022_4329_MOESM1_ESM.pdf]

Supplementary materials

S1. Probability curves of the four-category GAD-7 rating scale

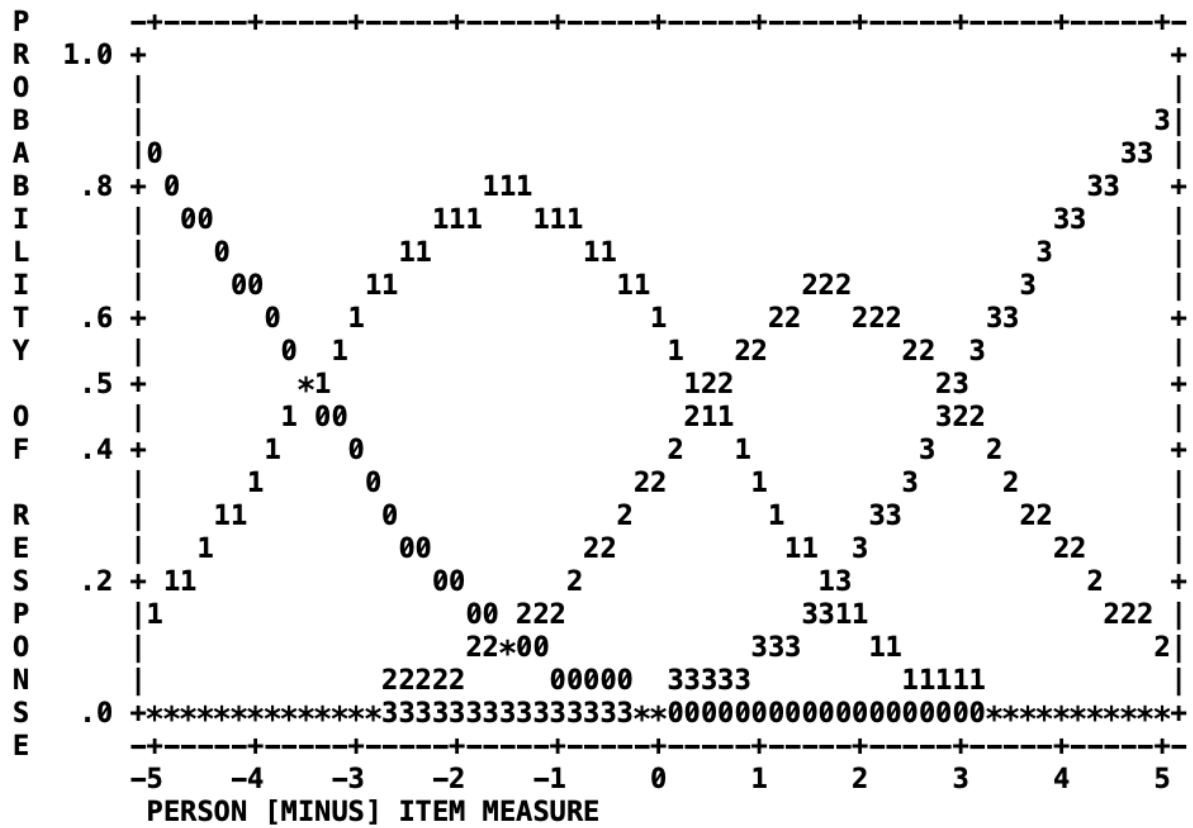

**S2. Output of principal component analysis of the item standardised residuals.**

|                                                  | <b>Eigenvalue</b> | <b>Observed</b> |
|--------------------------------------------------|-------------------|-----------------|
| Total raw variance in observations               | 17.6313           | 100.0%          |
| Raw variance explained by measures               | 10.6313           | 60.3%           |
| Raw variance explained by persons                | 8.8735            | 50.3%           |
| Raw variance explained by items                  | 1.7578            | 10.0%           |
| Raw unexplained variance (total)                 | 7.0000            | 39.7%           |
| Unexplained variance in 1 <sup>st</sup> contrast | 1.4518            | 8.2%            |
| Unexplained variance in 2 <sup>nd</sup> contrast | 1.3220            | 7.5%            |
| Unexplained variance in 3 <sup>rd</sup> contrast | 1.2357            | 7.0%            |
| Unexplained variance in 4 <sup>th</sup> contrast | 1.1170            | 6.3%            |
| Unexplained variance in 5 <sup>th</sup> contrast | 0.9605            | 5.4%            |

**S3. Largest standardised residual correlation for local dependence analysis.**

| <b>Item</b> | <b>Item</b> | <b>Correlation</b> |
|-------------|-------------|--------------------|
| 2           | 3           | .07                |
| 4           | 7           | -.27               |
| 2           | 6           | -.27               |
| 3           | 6           | -.25               |
| 4           | 6           | -.22               |
| 3           | 5           | -.22               |
| 1           | 3           | -.21               |
| 1           | 5           | -.20               |
| 2           | 5           | -.19               |
| 1           | 7           | -.18               |
| 1           | 4           | -.18               |
| 2           | 4           | -.18               |
| 3           | 7           | -.18               |
| 5           | 6           | -.16               |
| 6           | 7           | -.15               |
| 3           | 4           | -.14               |
| 2           | 7           | -.14               |
| 1           | 6           | -.13               |
| 1           | 2           | -.12               |
| 5           | 7           | -.08               |

**S4. Posteriori factor analysis of goemin-rotated factor loadings for the two-factor structure.**

|                                                      | <b>Factor 1</b>             | <b>Factor 2</b> |
|------------------------------------------------------|-----------------------------|-----------------|
| 1. Feeling nervous, anxious, or on edge              | 0.515                       | 0.301           |
| 2. Not being able to stop or control worrying        | 0.818*                      | 0.040           |
| 3. Worrying too much about different things          | 0.877*                      | -0.018          |
| 4. Trouble relaxing                                  | 0.356                       | 0.475*          |
| 5. Being so restless that it's hard to sit still     | -0.003                      | 0.851*          |
| 6. Becoming easily annoyed or irritable              | 0.249                       | 0.506           |
| 7. Feeling afraid as if something awful might happen | 0.281                       | 0.448           |
| <i>CFI</i>                                           | <i>0.970</i>                |                 |
| <i>TLI</i>                                           | <i>0.921</i>                |                 |
| <i>SRMR</i>                                          | <i>0.013</i>                |                 |
| <i>RMSEA</i>                                         | <i>0.099 (0.089, 0.109)</i> |                 |

CFI = comparative fit index (CFI), TLI = Tucker-Lewis index (TLI), RMSEA = root mean square error of approximation, and SRMR = standardised root-mean-square residual (SRMR). \*  $p < .05$
